# Supplementary material for: The Impact of the COVID-19 Pandemic on Israeli Orthodontic Practice: A Clinic’s Activity and Patients’ Attitudes
Source: MDPI journal article supplement (doi:10.3390/ijerph19041965), 2022-02-10
Supplement: s1 [file s1]

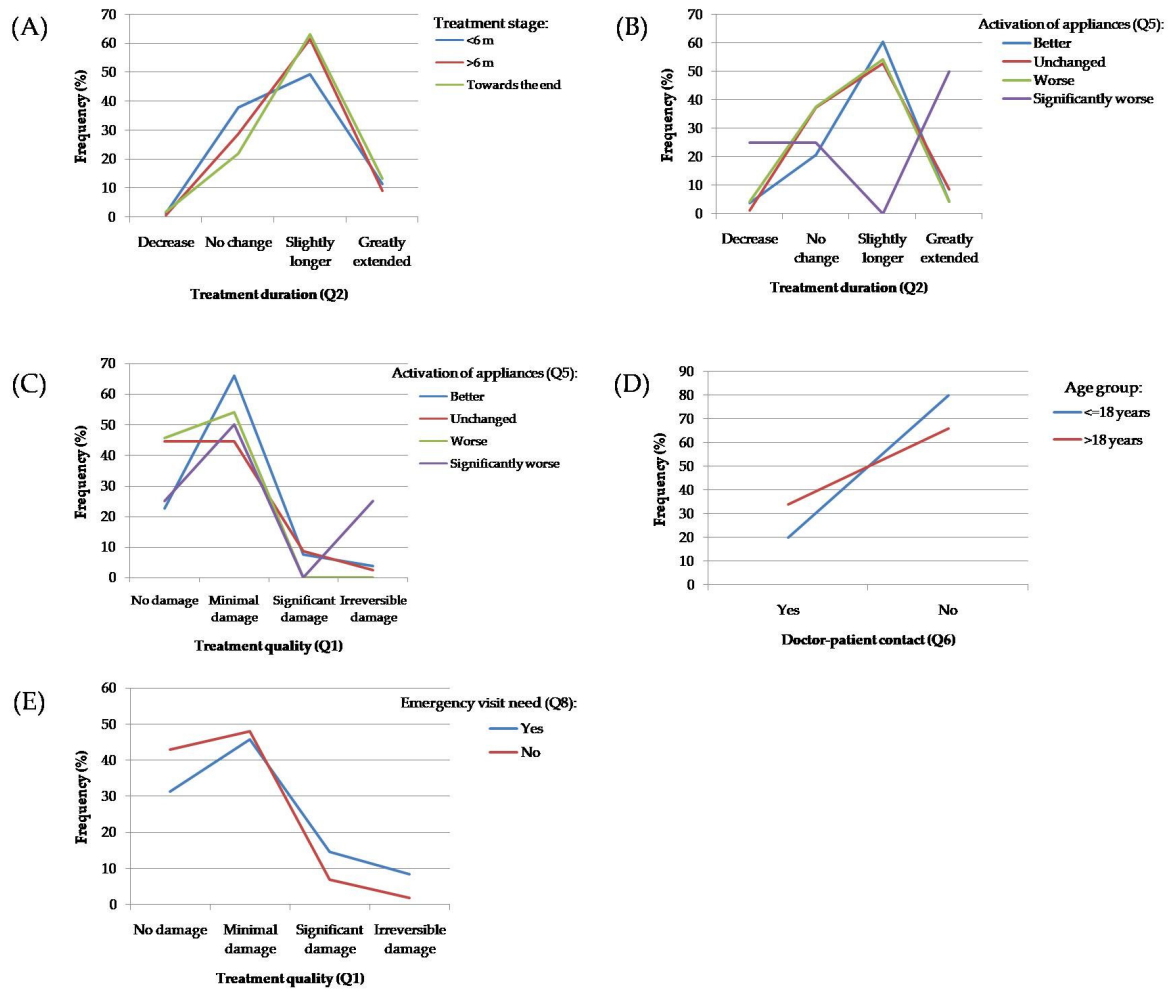

Figure S1. Graphic presentation of associations between subject responses: (A) Treatment duration (Q2) and the treatment stage of the subject; (B) treatment duration (Q2) and compliance with appliance activation (Q5); (C) treatment quality (Q1) and compliance with appliance activation (Q5); (D) doctor-patient contact (Q6) and patient age group; (E) treatment quality (Q1) and the need for an emergency visit during the lockdown (Q8).
